# Supplementary material
Source: Springer Nature journal article supplement (https://www.springermedizin.de/resource/supplementary/13058_2011_2965_MOESM5_ESM.pdf/9702894)

**A** Distribution PCR Efficiencies

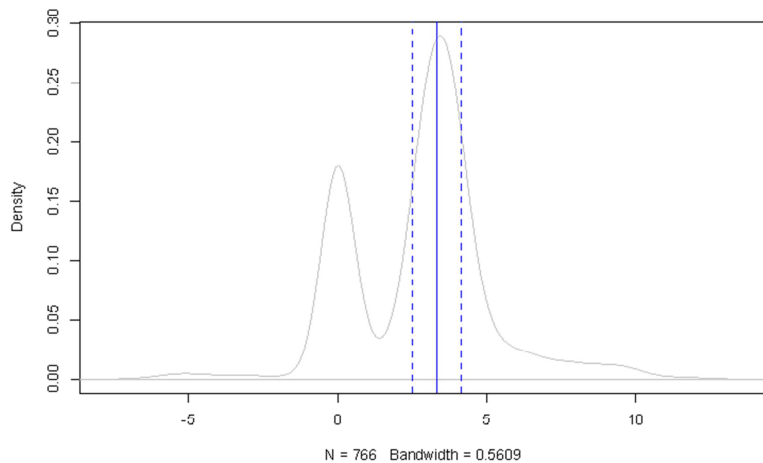

**B**  $Ct(\text{PreAmp}) = 0.952 \times Ct(\text{No PreAmp}) - 6.611$

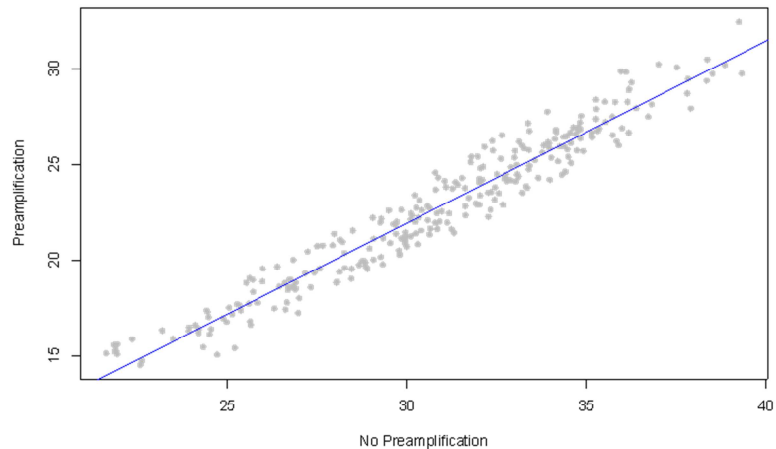

**C** Spearman Correlation Coefficient: 0.99,  $P < 0.001$

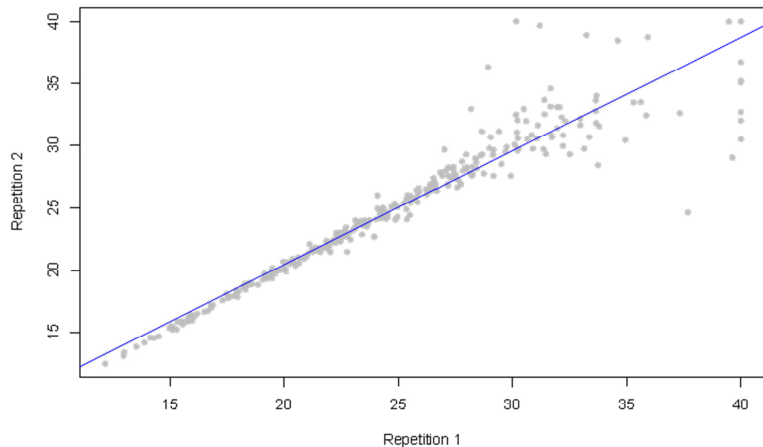

**D** Spearman Correlation Coefficient: 0.77,  $P < 0.001$

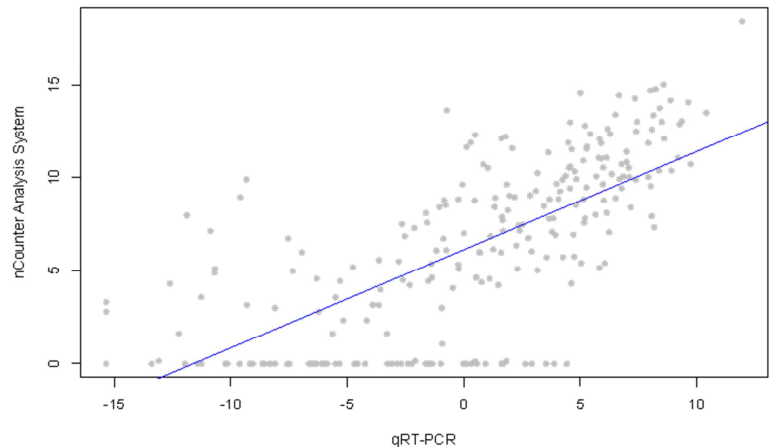

Supplement: MOESM5 [file 9702894]
